# Supplementary material
Source: PubMed Central journal article supplement (PMC8976358)
Supplement: 12984_2022_1015_MOESM1_ESM.pdf [file 12984_2022_1015_MOESM1_ESM.pdf]

# **A survey on the influence of CYBATHLON on the development and acceptance of advanced assistive technologies**

**Jan T. Meyer**<sup>1\*</sup>, Selina Weber<sup>1</sup>, Lukas Jäger<sup>2</sup>, Roland Sigrüst<sup>2</sup>, Roger Gassert<sup>1,2,3</sup>, Olivier Lambercy<sup>1,3</sup>

\* Correspondence: publications@relab.ethz.ch

<sup>1</sup> Rehabilitation Engineering Laboratory, ETH Zürich, Zürich, Switzerland

<sup>2</sup> CYBATHLON, ETH Zürich, Zürich, Switzerland

<sup>3</sup> Future Health Technologies, Singapore-ETH Centre, Campus for Research Excellence And  
Technological Enterprise (CREATE), Singapore

Supplementary Material 1 (pages 2-14) – Full survey: QuestionPro export (PIL and TL survey trees)  
Supplementary Material 2 (page 15) – Summary (readout) of linear mixed model

## ***CYBATHLON 2020 Survey Introduction Text***

Thank you for participating in our CYBATHLON 2020 survey. Your answers will help us understand to what extent users are involved in the development process of assistive technologies to identify which methods are used to promote user-centered design and assess device usability to evaluate the impact of the CYBATHLON on user involvement and device usability to determine how close the developed technologies are to application in daily life. We kindly ask you to answer the questions below, according to your personal opinion. To fully complete the survey, approximately 15-20 minutes are required. If you need further information to understand and answer a question, please click on the help sign (if provided). For all additional questions, do not hesitate to consult the survey coordinator. This work is supported by the Swiss National Science Foundation through the National Centre of Competence in Research on Robotics and the Vontobel Foundation. The data will be stored anonymously on the secured servers of QuestionPro (temporary) and ETH Zurich (permanently) with access limited to the survey coordinators. The anonymized data may be shared and made public. You may refuse to participate without consequences. If you decide to participate, you are free to quit the survey at any time without consequences, by just stopping and/or telling the survey coordinator. By clicking "Next" below, you agree to these terms and conditions.

Please type in your response-ID, which you received from the study coordinator (Sample ID: cya9):

### ***Pilot survey tree***

What is your age?

1. 18-24
2. 25-34
3. 35-44
4. 45-54
5. 55-64
6. Above 64

What is your gender?

1. Male
2. Female
3. Non-binary
4. Prefer not to disclose
5. Prefer to self-describe \_\_\_\_\_

What is the highest level of education you have completed?

1. Compulsory/elementary school qualifications
2. High school diploma (or equivalent)
3. Apprenticeship/technical training
4. Bachelor's degree
5. Master's degree
6. Doctoral degree
7. Other \_\_\_\_\_

Do you have a technical/engineering background?

1. Yes
2. No

In which CYBATHLON discipline do you compete with your device?

1. Powered Arm Prosthesis Race
2. Powered Leg Prosthesis Race
3. Powered Exoskeleton Race
4. Powered Wheelchair Race
5. Functional Electrical Stimulation (FES) Bike Race

The device I am using at the CYBATHLON 2020...

1. ... was built from scratch (for me)
2. ... builds on an existing/previous (research) prototype
3. ... is a (modified) commercial product
4. Other \_\_\_\_\_

Have you been personally involved in the device development? If yes, for how long?

1. No, not at all
2. Less than 6 months
3. 6-12 months
4. 1-2 years
5. 2-4 years
6. More than 4 years

To what extent were you personally involved in the following device development stages? 0 = not involved at all, 100 = leading role

|                                           |                          |
|-------------------------------------------|--------------------------|
|                                           |                          |
| Empathizing with the user needs           | <input type="checkbox"/> |
| Defining device requirements              | <input type="checkbox"/> |
| Formulating design ideas and concepts     | <input type="checkbox"/> |
| Creating prototypes/devices               | <input type="checkbox"/> |
| Testing and evaluating prototypes/devices | <input type="checkbox"/> |

Why were you not involved in the device development? You can choose multiple options and/or add others

1. I was not asked to
2. I use a commercial product
3. I was not around at that time
4. I did not want to
5. Other \_\_\_\_\_

To what extent do you agree with the following statements about your development involvement?

|                                                       | Strongly disagree        | Disagree                 | Neutral                  | Agree                    | Strongly agree           |
|-------------------------------------------------------|--------------------------|--------------------------|--------------------------|--------------------------|--------------------------|
| I gave active input on the design                     | <input type="checkbox"/> | <input type="checkbox"/> | <input type="checkbox"/> | <input type="checkbox"/> | <input type="checkbox"/> |
| My inputs were fully considered in the design         | <input type="checkbox"/> | <input type="checkbox"/> | <input type="checkbox"/> | <input type="checkbox"/> | <input type="checkbox"/> |
| I was sufficiently involved in the device development | <input type="checkbox"/> | <input type="checkbox"/> | <input type="checkbox"/> | <input type="checkbox"/> | <input type="checkbox"/> |

To what extent is an improvement in performance with your device depending on training, and/or on design optimizations?

|                                                                                | Completely depending on design optimizations | Rather depending on design optimizations | Equally depending on both | Rather depending on training | Completely depending on training |
|--------------------------------------------------------------------------------|----------------------------------------------|------------------------------------------|---------------------------|------------------------------|----------------------------------|
| In your current scenario, given your resources (materials, time, costs, etc.)  | <input type="checkbox"/>                     | <input type="checkbox"/>                 | <input type="checkbox"/>  | <input type="checkbox"/>     | <input type="checkbox"/>         |
| In an ideal scenario, given unlimited resources (materials, time, costs, etc.) | <input type="checkbox"/>                     | <input type="checkbox"/>                 | <input type="checkbox"/>  | <input type="checkbox"/>     | <input type="checkbox"/>         |

Please rank the following attributes of your device, according to their importance for daily use: 1 &#61; most important, 4 &#61; least important

- Satisfaction (comfort, adaptability, pleasure, etc.) \_\_\_\_\_
- Effectiveness (functionality, reliability, accuracy, etc.) \_\_\_\_\_
- Efficiency (time, mental workload, physical workload, etc.) \_\_\_\_\_
- Safety (ergonomics, risk-free use, etc.) \_\_\_\_\_

How satisfied are you with...

|                                                                         | Not satisfied at all     | Not very satisfied       | More or less satisfied   | Quite satisfied          | Very satisfied           |
|-------------------------------------------------------------------------|--------------------------|--------------------------|--------------------------|--------------------------|--------------------------|
| ... the dimensions (size, height, length, width) of your device?        | <input type="checkbox"/> | <input type="checkbox"/> | <input type="checkbox"/> | <input type="checkbox"/> | <input type="checkbox"/> |
| ... the weight of your device?                                          | <input type="checkbox"/> | <input type="checkbox"/> | <input type="checkbox"/> | <input type="checkbox"/> | <input type="checkbox"/> |
| ... the ease in adjusting (fixing, fastening) the parts of your device? | <input type="checkbox"/> | <input type="checkbox"/> | <input type="checkbox"/> | <input type="checkbox"/> | <input type="checkbox"/> |
| ... how safe and secure your device is?                                 | <input type="checkbox"/> | <input type="checkbox"/> | <input type="checkbox"/> | <input type="checkbox"/> | <input type="checkbox"/> |
| ... the durability (endurance, resistance to wear) of your device?      | <input type="checkbox"/> | <input type="checkbox"/> | <input type="checkbox"/> | <input type="checkbox"/> | <input type="checkbox"/> |

|                                                                                           |                          |                          |                          |                          |                          |
|-------------------------------------------------------------------------------------------|--------------------------|--------------------------|--------------------------|--------------------------|--------------------------|
| ... how easy to use your device is?                                                       | <input type="checkbox"/> | <input type="checkbox"/> | <input type="checkbox"/> | <input type="checkbox"/> | <input type="checkbox"/> |
| ... how comfortable your device is?                                                       | <input type="checkbox"/> | <input type="checkbox"/> | <input type="checkbox"/> | <input type="checkbox"/> | <input type="checkbox"/> |
| ... how effective your device is (i.e. the degree to which your device meets your needs)? | <input type="checkbox"/> | <input type="checkbox"/> | <input type="checkbox"/> | <input type="checkbox"/> | <input type="checkbox"/> |

How do you currently control the device's actions to complete the obstacle/race course? You can choose multiple options. If you are unsure, please specify your input method in &#34;Other&#34;

1. Conventional direct control inputs (e.g. manual buttons, switches, touch displays, joysticks)
2. Non-conventional direct control inputs (e.g. voice control, sip-and-puff, tongue switches)
3. Muscle signals (non-invasive, e.g. EMG, MMG)
4. Brain signals (non-invasive, e.g. EEG, fNIRS)
5. Other \_\_\_\_\_

If you could choose freely, how would you like to control the device's actions? You can choose multiple options. If you are unsure, please specify your input method in &#34;Other&#34;

1. Conventional direct control inputs (e.g. manual buttons, switches, touch displays, joysticks)
2. Non-conventional direct control inputs (e.g. voice control, sip-and-puff, tongue switches)
3. Muscle signals (non-invasive, e.g. EMG, MMG)
4. Brain signals (non-invasive, e.g. EEG, fNIRS)
5. Other \_\_\_\_\_

To what extent do you agree with the following statements?

|                                                                                                                                                  | Strongly disagree        | Disagree                 | Neutral                  | Agree                    | Strongly agree           |
|--------------------------------------------------------------------------------------------------------------------------------------------------|--------------------------|--------------------------|--------------------------|--------------------------|--------------------------|
| The device always follows my intentions                                                                                                          | <input type="checkbox"/> | <input type="checkbox"/> | <input type="checkbox"/> | <input type="checkbox"/> | <input type="checkbox"/> |
| I had to learn a lot before I was confident controlling the device                                                                               | <input type="checkbox"/> | <input type="checkbox"/> | <input type="checkbox"/> | <input type="checkbox"/> | <input type="checkbox"/> |
| Controlling the device is very mentally demanding                                                                                                | <input type="checkbox"/> | <input type="checkbox"/> | <input type="checkbox"/> | <input type="checkbox"/> | <input type="checkbox"/> |
| I would accept the risk of a surgery (e.g. implanting electrodes, transfer of nerve endings) in exchange for a more natural control of my device | <input type="checkbox"/> | <input type="checkbox"/> | <input type="checkbox"/> | <input type="checkbox"/> | <input type="checkbox"/> |

For how long have you been testing/training on the CYBATHLON obstacle/race course?

|                         | Less than 6 months       | 1 year                   | 2 years                  | 3 years                  | 4 years or more          |
|-------------------------|--------------------------|--------------------------|--------------------------|--------------------------|--------------------------|
| Please place the slider | <input type="checkbox"/> | <input type="checkbox"/> | <input type="checkbox"/> | <input type="checkbox"/> | <input type="checkbox"/> |

In the last two months, how many hours per week (on average) did you spend training and practicing with the device?

|                         | Less than 1 hour         | 2 hours                  | 4 hours                  | 6 hours                  | 8 hours                  | 10 hours                 | 12 hours                 | 14 hours                 | 16 hours                 | 18 hours                 | 20 hours or more         |
|-------------------------|--------------------------|--------------------------|--------------------------|--------------------------|--------------------------|--------------------------|--------------------------|--------------------------|--------------------------|--------------------------|--------------------------|
| Please place the slider | <input type="checkbox"/> | <input type="checkbox"/> | <input type="checkbox"/> | <input type="checkbox"/> | <input type="checkbox"/> | <input type="checkbox"/> | <input type="checkbox"/> | <input type="checkbox"/> | <input type="checkbox"/> | <input type="checkbox"/> | <input type="checkbox"/> |

To what extent do you agree with the following statements about your discipline's CYBATHLON obstacle/race track?

|                                                                     | Strongly disagree        | Disagree                 | Neutral                  | Agree                    | Strongly agree           |
|---------------------------------------------------------------------|--------------------------|--------------------------|--------------------------|--------------------------|--------------------------|
| The obstacle/race track represents realistic tasks of daily living  | <input type="checkbox"/> | <input type="checkbox"/> | <input type="checkbox"/> | <input type="checkbox"/> | <input type="checkbox"/> |
| Performing well at the race indicates high usability for daily life | <input type="checkbox"/> | <input type="checkbox"/> | <input type="checkbox"/> | <input type="checkbox"/> | <input type="checkbox"/> |
| I am willing to take risks in order to win the race                 | <input type="checkbox"/> | <input type="checkbox"/> | <input type="checkbox"/> | <input type="checkbox"/> | <input type="checkbox"/> |
| I think I have a good chance to win the race                        | <input type="checkbox"/> | <input type="checkbox"/> | <input type="checkbox"/> | <input type="checkbox"/> | <input type="checkbox"/> |

To what extent do you agree with the following statements about the CYBATHLON's influence on your life?

|                                                                                                       | Strongly Disagree        | Disagree                 | Neutral                  | Agree                    | Strongly Agree           |
|-------------------------------------------------------------------------------------------------------|--------------------------|--------------------------|--------------------------|--------------------------|--------------------------|
| I feel more comfortable expressing my needs as an assistive technology user                           | <input type="checkbox"/> | <input type="checkbox"/> | <input type="checkbox"/> | <input type="checkbox"/> | <input type="checkbox"/> |
| I feel representative of the target group of the assistive device I am using at the CYBATHLON         | <input type="checkbox"/> | <input type="checkbox"/> | <input type="checkbox"/> | <input type="checkbox"/> | <input type="checkbox"/> |
| The CYBATHLON has a positive effect on the social awareness and inclusion of people with disabilities | <input type="checkbox"/> | <input type="checkbox"/> | <input type="checkbox"/> | <input type="checkbox"/> | <input type="checkbox"/> |

Please rank the following statements about your personal goals and reward for your engagement at the CYBATHLON: 1 - most important, 5 - least important

- I want to help with the development of novel assistive technology \_\_\_\_\_
- I see myself as an athlete, competing at an international contest \_\_\_\_\_
- I see the device usage as physical and mental training \_\_\_\_\_
- My engagement is motivated by monetary compensation \_\_\_\_\_
- I want to raise awareness for people with disabilities \_\_\_\_\_

Are you using, or have you used the device in your daily life (besides CYBATHLON related

training/testing)?

1. Yes
2. No

How long have you been using your device in daily life?

|                         | Less than 6 months       | 1 year                   | 2 years                  | 3 years                  | 4 years or more          |
|-------------------------|--------------------------|--------------------------|--------------------------|--------------------------|--------------------------|
| Please place the slider | <input type="checkbox"/> | <input type="checkbox"/> | <input type="checkbox"/> | <input type="checkbox"/> | <input type="checkbox"/> |

In which activities of daily living are you assisted/supported by your device? You can choose multiple options and/or add others

1. Work
2. Therapy
3. Leisure (sports, exercise, etc.)
4. Dressing, undressing
5. Mobility, transferring
6. Personal hygiene (washing, grooming, etc.)
7. Maintaining continence
8. Food preparation, eating, drinking
9. Other \_\_\_\_\_

In which activities of daily living would you like to be assisted/supported by your device? You can choose multiple options and/or add others

1. Work
2. Therapy
3. Leisure (sports, exercise, etc.)
4. Dressing, undressing
5. Mobility, transferring
6. Personal hygiene (washing, grooming, etc.)
7. Maintaining continence
8. Food preparation, eating, drinking
9. Other \_\_\_\_\_
10. None of the above

What are currently the most limiting factors restricting the daily use of your device? You can choose multiple options and/or add others

1. Too complicated to use
2. I cannot use it independently
3. Limited comfort
4. Unpleasant aesthetics
5. Unreliable functionality
6. Not helpful in daily life
7. Not compatible with daily life (home/work environment)
8. Not safe for use in daily life
9. Not robust (e.g. fragile parts, not waterproof, etc.)
10. Limited accessibility OR not commercially available yet
11. Too expensive
12. Other \_\_\_\_\_
13. There is no limitation

## **Technical Lead survey tree**

What is your age?

1. Under 18
2. 18-24
3. 25-34
4. 35-44
5. 45-54
6. 55-64
7. Above 64

What is your gender?

1. Male
2. Female
3. Non-binary
4. Prefer not to disclose
5. Prefer to self-describe \_\_\_\_\_

What is your professional/educational background?

1. Mechanical engineering
2. Electrical engineering
3. Computer sciences
4. Biomedical engineering
5. Physical therapy
6. Occupational therapy
7. Medicine
8. Health and/or movement sciences
9. Industrial design
10. Other \_\_\_\_\_

What is the highest level of education you have completed?

1. Compulsory/elementary school qualifications
2. High school diploma (or equivalent)
3. Apprenticeship/technical training
4. Bachelor's degree
5. Master's degree
6. Doctoral degree
7. Other \_\_\_\_\_

In which CYBATHLON discipline do you compete with your device?

1. Powered Arm Prosthesis Race
2. Powered Leg Prosthesis Race
3. Powered Exoskeleton Race
4. Powered Wheelchair Race
5. Functional Electrical Stimulation (FES) Bike Race

Did your team (university, company or else) already participate in the CYBATHLON 2016?

1. Yes
2. No



To what extent does your current device compare to the one your previous team used in 2016?

1. We use exactly the same device
2. We made minor changes on the previous device
3. We made major changes on the previous device
4. We use a completely different device
5. Other \_\_\_\_\_

The device we are using at the CYBATHLON 2020...

1. ... was built from scratch
2. ... builds on an existing/previous (research) prototype
3. ... is a (modified) commercial product
4. Other \_\_\_\_\_

What happens to the device after the CYBATHLON 2020? You can choose multiple options and/or add others

1. We give the device (back) to the pilot to use it in daily life
2. We will continue the device development without the current pilot(s)
3. We will continue the device development with the current pilot(s)
4. We aim to bring the device concept to the market
5. Other \_\_\_\_\_
6. I don't know OR no plans yet

For how long have you been personally involved in the device development?

1. Less than 6 months
2. 6-12 months
3. 1-2 years
4. 2-4 years
5. More than 4 years

To what extent were you personally involved in the following device development stages? 0 = not involved at all, 100 = leading role

|                                           |                          |
|-------------------------------------------|--------------------------|
|                                           |                          |
| Empathizing with the user needs           | <input type="checkbox"/> |
| Defining device requirements              | <input type="checkbox"/> |
| Formulating design ideas and concepts     | <input type="checkbox"/> |
| Creating prototypes/devices               | <input type="checkbox"/> |
| Testing and evaluating prototypes/devices | <input type="checkbox"/> |

To what extent was your main pilot involved in the following device development stages? 0 = not involved at all, 100 = leading role

|  |  |
|--|--|
|  |  |
|--|--|

|                                           |                          |
|-------------------------------------------|--------------------------|
| Empathizing with the user needs           | <input type="checkbox"/> |
| Defining device requirements              | <input type="checkbox"/> |
| Formulating design ideas and concepts     | <input type="checkbox"/> |
| Creating prototypes/devices               | <input type="checkbox"/> |
| Testing and evaluating prototypes/devices | <input type="checkbox"/> |

To what extent do you agree with the following statements about the development involvement?

|                                                                       | Strongly disagree        | Disagree                 | Neutral                  | Agree                    | Strongly agree           |
|-----------------------------------------------------------------------|--------------------------|--------------------------|--------------------------|--------------------------|--------------------------|
| The pilot(s) gave active input on the design                          | <input type="checkbox"/> | <input type="checkbox"/> | <input type="checkbox"/> | <input type="checkbox"/> | <input type="checkbox"/> |
| The pilot(s)' inputs were fully considered in the design              | <input type="checkbox"/> | <input type="checkbox"/> | <input type="checkbox"/> | <input type="checkbox"/> | <input type="checkbox"/> |
| The pilot(s) was/were sufficiently involved in the device development | <input type="checkbox"/> | <input type="checkbox"/> | <input type="checkbox"/> | <input type="checkbox"/> | <input type="checkbox"/> |

To what extent is a pilot's improvement in performance with your device depending on training, and/or on design optimizations?

|                                                                                | Completely depending on design optimizations | Rather depending on design optimizations | Equally depending on both | Rather depending on training | Completely depending on training |
|--------------------------------------------------------------------------------|----------------------------------------------|------------------------------------------|---------------------------|------------------------------|----------------------------------|
| In your current scenario, given your resources (materials, time, costs, etc.)  | <input type="checkbox"/>                     | <input type="checkbox"/>                 | <input type="checkbox"/>  | <input type="checkbox"/>     | <input type="checkbox"/>         |
| In an ideal scenario, given unlimited resources (materials, time, costs, etc.) | <input type="checkbox"/>                     | <input type="checkbox"/>                 | <input type="checkbox"/>  | <input type="checkbox"/>     | <input type="checkbox"/>         |

Please rank the following attributes of your device, according to their importance for daily use: 1 - most important, 4 - least important

- Satisfaction (comfort, adaptability, pleasure, etc.) \_\_\_\_\_
- Effectiveness (functionality, reliability, accuracy, etc.) \_\_\_\_\_
- Efficiency (time, mental workload, physical workload, etc.) \_\_\_\_\_
- Safety (ergonomics, risk-free use, etc.) \_\_\_\_\_

How satisfied are you with...

|  | Not satisfied at | Not very satisfied | More or less | Quite satisfied | Very satisfied |
|--|------------------|--------------------|--------------|-----------------|----------------|
|  |                  |                    |              |                 |                |

|                                                                                                 | all                      |                          | satisfied                |                          |                          |
|-------------------------------------------------------------------------------------------------|--------------------------|--------------------------|--------------------------|--------------------------|--------------------------|
| ... the dimensions (size, height, length, width) of your device?                                | <input type="checkbox"/> | <input type="checkbox"/> | <input type="checkbox"/> | <input type="checkbox"/> | <input type="checkbox"/> |
| ... the weight of your device?                                                                  | <input type="checkbox"/> | <input type="checkbox"/> | <input type="checkbox"/> | <input type="checkbox"/> | <input type="checkbox"/> |
| ... the ease in adjusting (fixing, fastening) the parts of your device?                         | <input type="checkbox"/> | <input type="checkbox"/> | <input type="checkbox"/> | <input type="checkbox"/> | <input type="checkbox"/> |
| ... how safe and secure your device is?                                                         | <input type="checkbox"/> | <input type="checkbox"/> | <input type="checkbox"/> | <input type="checkbox"/> | <input type="checkbox"/> |
| ... the durability (endurance, resistance to wear) of your device?                              | <input type="checkbox"/> | <input type="checkbox"/> | <input type="checkbox"/> | <input type="checkbox"/> | <input type="checkbox"/> |
| ... how easy to use your device is?                                                             | <input type="checkbox"/> | <input type="checkbox"/> | <input type="checkbox"/> | <input type="checkbox"/> | <input type="checkbox"/> |
| ... how comfortable your device is?                                                             | <input type="checkbox"/> | <input type="checkbox"/> | <input type="checkbox"/> | <input type="checkbox"/> | <input type="checkbox"/> |
| ... how effective your device is (i.e. the degree to which your device meets the user's needs)? | <input type="checkbox"/> | <input type="checkbox"/> | <input type="checkbox"/> | <input type="checkbox"/> | <input type="checkbox"/> |

What general evaluation methods did you use to assess the usability of your device? You can choose multiple options and/or add others

1. Interview, unstructured/oral feedback
2. Questionnaires, surveys, scales
3. Performance-related measures (task completion, functional tests, time for task etc.)
4. Qualitative observation of pilots (video analysis, eye-tracking, etc.)
5. Quantitative observation of pilots (motion capture, eye-tracking, etc.)
6. Thinking aloud
7. Expert evaluation
8. Model- and simulation-based approaches
9. Document-based approaches
10. Other \_\_\_\_\_
11. None of the above

Please rank the following evaluation methods, according to their usefulness to assess the usability of your device: 1 &#61; most useful, 9 &#61; least useful; select at least 7 choices to rank them

- Interview, unstructured/oral feedback \_\_\_\_\_
- Questionnaires, surveys, scales \_\_\_\_\_
- Performance-related measures (task completion, functional tests, time for task, etc.) \_\_\_\_\_
- Qualitative observation of pilots (video analysis, eye-tracking, etc.) \_\_\_\_\_
- Quantitative observation of pilots (motion capture, eye-tracking, etc.) \_\_\_\_\_
- Thinking aloud \_\_\_\_\_
- Expert evaluation \_\_\_\_\_
- Model- and simulation-based approaches \_\_\_\_\_
- Document-based approaches \_\_\_\_\_

How many pilots did your team recruit and test with to participate in the CYBATHLON 2020?

1. 1
2. 2
3. 3
4. More than 3

For how long has your team (with AND without pilot(s)) been testing/training on the CYBATHLON obstacle/race course?

|                         | Less than 6 months       | 1 year                   | 2 years                  | 3 years                  | 4 years or more          |
|-------------------------|--------------------------|--------------------------|--------------------------|--------------------------|--------------------------|
| Please place the slider | <input type="checkbox"/> | <input type="checkbox"/> | <input type="checkbox"/> | <input type="checkbox"/> | <input type="checkbox"/> |

In the last two months, how many hours per week (on average) did you spend testing and training with your device (with AND without pilot(s))?

|                         | Less than 1 hour         | 2 hours                  | 4 hours                  | 6 hours                  | 8 hours                  | 10 hours                 | 12 hours                 | 14 hours                 | 16 hours                 | 18 hours                 | 20 hours or more         |
|-------------------------|--------------------------|--------------------------|--------------------------|--------------------------|--------------------------|--------------------------|--------------------------|--------------------------|--------------------------|--------------------------|--------------------------|
| Please place the slider | <input type="checkbox"/> | <input type="checkbox"/> | <input type="checkbox"/> | <input type="checkbox"/> | <input type="checkbox"/> | <input type="checkbox"/> | <input type="checkbox"/> | <input type="checkbox"/> | <input type="checkbox"/> | <input type="checkbox"/> | <input type="checkbox"/> |

To what extent do you agree with the following statements about your discipline's CYBATHLON obstacle/race track?

|                                                                     | Strongly disagree        | Disagree                 | Neutral                  | Agree                    | Strongly agree           |
|---------------------------------------------------------------------|--------------------------|--------------------------|--------------------------|--------------------------|--------------------------|
| The obstacle/race track represents realistic tasks of daily living  | <input type="checkbox"/> | <input type="checkbox"/> | <input type="checkbox"/> | <input type="checkbox"/> | <input type="checkbox"/> |
| Performing well at the race indicates high usability for daily life | <input type="checkbox"/> | <input type="checkbox"/> | <input type="checkbox"/> | <input type="checkbox"/> | <input type="checkbox"/> |

How many obstacles of your discipline's race track do you aim to overcome at the CYBATHLON 2020?

|                         | 1 obstacle               | 2 obstacles              | 3 obstacles              | 4 obstacles              | 5 obstacles              | (All) 6 obstacles        |
|-------------------------|--------------------------|--------------------------|--------------------------|--------------------------|--------------------------|--------------------------|
| Please place the slider | <input type="checkbox"/> | <input type="checkbox"/> | <input type="checkbox"/> | <input type="checkbox"/> | <input type="checkbox"/> | <input type="checkbox"/> |

How many percent of your discipline's race track do you aim to overcome at the CYBATHLON 2020?

|                         | 20%(240m)                | 40%(480m)                | 60%(720m)                | 80%(960m)                | 100%(1200m)              |
|-------------------------|--------------------------|--------------------------|--------------------------|--------------------------|--------------------------|
| Please place the slider | <input type="checkbox"/> | <input type="checkbox"/> | <input type="checkbox"/> | <input type="checkbox"/> | <input type="checkbox"/> |

Why do you not aim to overcome all (obstacles of) the race track? You can choose multiple options and/or add others

1. Due to the time restriction
2. Due to safety reasons
3. Due to limited functionality of the device
4. For strategic reasons
5. Other \_\_\_\_\_

To what extent do you agree with the following statements about the CYBATHLON's influence on device development?

|                                                                                              | Strongly disagree        | Disagree                 | Neutral                  | Agree                    | Strongly agree           |
|----------------------------------------------------------------------------------------------|--------------------------|--------------------------|--------------------------|--------------------------|--------------------------|
| The device's usability benefited from the (aim of) participation at the CYBATHLON            | <input type="checkbox"/> | <input type="checkbox"/> | <input type="checkbox"/> | <input type="checkbox"/> | <input type="checkbox"/> |
| The CYBATHLON's regulations and restrictions limited the development of the device           | <input type="checkbox"/> | <input type="checkbox"/> | <input type="checkbox"/> | <input type="checkbox"/> | <input type="checkbox"/> |
| The target-user involvement in the development process was increased due to the CYBATHLON    | <input type="checkbox"/> | <input type="checkbox"/> | <input type="checkbox"/> | <input type="checkbox"/> | <input type="checkbox"/> |
| The CYBATHLON motivated our team to face new challenges                                      | <input type="checkbox"/> | <input type="checkbox"/> | <input type="checkbox"/> | <input type="checkbox"/> | <input type="checkbox"/> |
| My understanding and empathy for people with disabilities has increased due to the CYBATHLON | <input type="checkbox"/> | <input type="checkbox"/> | <input type="checkbox"/> | <input type="checkbox"/> | <input type="checkbox"/> |

To what extent do you agree with the following statements about the CYBATHLON's impact on rehabilitation technology in general?

|                                                                                              | Strongly disagree        | Disagree                 | Neutral                  | Agree                    | Strongly agree           |
|----------------------------------------------------------------------------------------------|--------------------------|--------------------------|--------------------------|--------------------------|--------------------------|
| The general research interest has increased, since the initiation of the CYBATHLON           | <input type="checkbox"/> | <input type="checkbox"/> | <input type="checkbox"/> | <input type="checkbox"/> | <input type="checkbox"/> |
| The CYBATHLON enabled more/new funding for our device/project                                | <input type="checkbox"/> | <input type="checkbox"/> | <input type="checkbox"/> | <input type="checkbox"/> | <input type="checkbox"/> |
| The CYBATHLON has a positive effect on the social acceptance of robotic assistive technology | <input type="checkbox"/> | <input type="checkbox"/> | <input type="checkbox"/> | <input type="checkbox"/> | <input type="checkbox"/> |
| The CYBATHLON allows for valuable comparison to the state-of-the-art technology              | <input type="checkbox"/> | <input type="checkbox"/> | <input type="checkbox"/> | <input type="checkbox"/> | <input type="checkbox"/> |
| The CYBATHLON facilitates the translation from research prototypes to market products        | <input type="checkbox"/> | <input type="checkbox"/> | <input type="checkbox"/> | <input type="checkbox"/> | <input type="checkbox"/> |

In which activities of daily living is/are your main pilot(s) assisted/supported by the device (besides CYBATHLON related training/testing)? You can choose multiple options and/or add others

1. Work
2. Therapy
3. Leisure (sports, exercise, etc.)
4. Dressing, undressing

5. Mobility, transferring
6. Personal hygiene (washing, grooming, etc.)
7. Maintaining continence
8. Food preparation, eating, drinking
9. Other \_\_\_\_\_
10. None of the above

In which activities of daily living do you think the pilot(s) could be assisted/supported by the device (additionally)? You can choose multiple options and/or add others

1. Work
2. Therapy
3. Leisure (sports, exercise, etc.)
4. Dressing, undressing
5. Mobility, transferring
6. Personal hygiene (washing, grooming, etc.)
7. Maintaining continence
8. Food preparation, eating, drinking
9. Other \_\_\_\_\_
10. Not intended for daily life

What are currently the most limiting factors restricting the daily use of your device? You can choose multiple options and/or add others

1. Too complicated to use
2. Pilots cannot use it independently
3. Limited comfort
4. Unpleasant aesthetics
5. Unreliable functionality
6. Not helpful in daily life
7. Not compatible with daily life (home/work environment)
8. Not safe for use in daily life
9. Not robust (e.g. fragile parts, not waterproof, etc.)
10. Limited accessibility OR not commercially available yet
11. Too expensive
12. Other \_\_\_\_\_
13. There is no limitation

## Supplementary Material 2 – Summary (readout) of linear mixed model

### summary(fit)

Linear mixed model fit by REML. t-tests use Satterthwaite's method [lmerModLmerTest]

**Formula:** relative\_rank ~ QUEST\_score \* daily\_use + involvement\_quality + involvement\_duration + training\_intensty + training\_duration + (1|discipline)

REML criterion at convergence: 169.2

#### Scaled residuals:

| Min      | 1Q       | Median  | 3Q      | Max     |
|----------|----------|---------|---------|---------|
| -1.08099 | -0.51299 | 0.06473 | 0.40401 | 1.79786 |

#### Random effects:

| Groups     | Name        | Variance | Std.Dev. |
|------------|-------------|----------|----------|
| discipline | (Intercept) | 76.48    | 8.745    |
| Residual   |             | 581.15   | 24.107   |

Number of obs: 31, groups: discipline, 5

Fixed effects:

|                                    | Estimate  | Std. Error | df       | t value | Pr(> t ) |    |
|------------------------------------|-----------|------------|----------|---------|----------|----|
| (Intercept)                        | -49.70257 | 56.62992   | 14.32796 | -0.878  | 0.3946   |    |
| QUEST_score                        | 18.65628  | 14.22189   | 13.79464 | 1.312   | 0.211    |    |
| daily_use_yes                      | 308.04598 | 131.94457  | 14.23078 | 2.335   | 0.0347   | *  |
| involv_quality                     | -0.22778  | 0.08651    | 14.45538 | -2.633  | 0.01927  | *  |
| involv_duration_less than 6 months | 49.22009  | 28.40878   | 14.93191 | 1.733   | 0.10377  |    |
| involv_duration_6-12 months        | 83.42611  | 34.75423   | 13.92168 | 2.4     | 0.03093  | *  |
| involv_duration_1-2 years          | 95.427    | 36.81168   | 14.9968  | 2.592   | 0.02041  | *  |
| involv_duration_2-4 years          | 133.00393 | 41.7855    | 14.2454  | 3.183   | 0.00652  | ** |
| involv_duration_More than 4 years  | 126.79887 | 39.90219   | 14.95222 | 3.178   | 0.00626  | ** |
| raining_intensty_3 - 8 hours       | -7.83198  | 19.74441   | 14.99294 | -0.397  | 0.6972   |    |
| raining_intensty_9 - 19 hours      | -34.98215 | 27.16067   | 14.94227 | -1.288  | 0.21735  |    |
| raining_intensty_20 hours or more  | -2.82004  | 26.84815   | 14.96437 | -0.105  | 0.91774  |    |
| training_duration_1 year           | -0.04928  | 13.45249   | 14.79828 | -0.004  | 0.99713  |    |
| training_duration_2 years          | -22.07843 | 19.90436   | 10.59931 | -1.109  | 0.29187  |    |
| training_duration_4 years or more  | 22.20349  | 23.48456   | 14.55044 | 0.945   | 0.35987  |    |
| QUEST_score:daily_use_yes          | -72.49108 | 32.41155   | 14.46335 | -2.237  | 0.04154  | *  |

---

Signif. codes: 0 '\*\*\*' 0.001 '\*\*' 0.01 '\*' 0.05 '.' 0.1 ' ' 1
